# Supplementary material for: Erratum to: Exploring functional data analysis and wavelet principal component analysis on ecstasy (MDMA) wastewater data
Source: Springer Nature journal article supplement (doi:10.1186/s12874-017-0311-y), 2017-02-23

**(A) Functional principal component analysis using Fourier basis functions with no smoothing**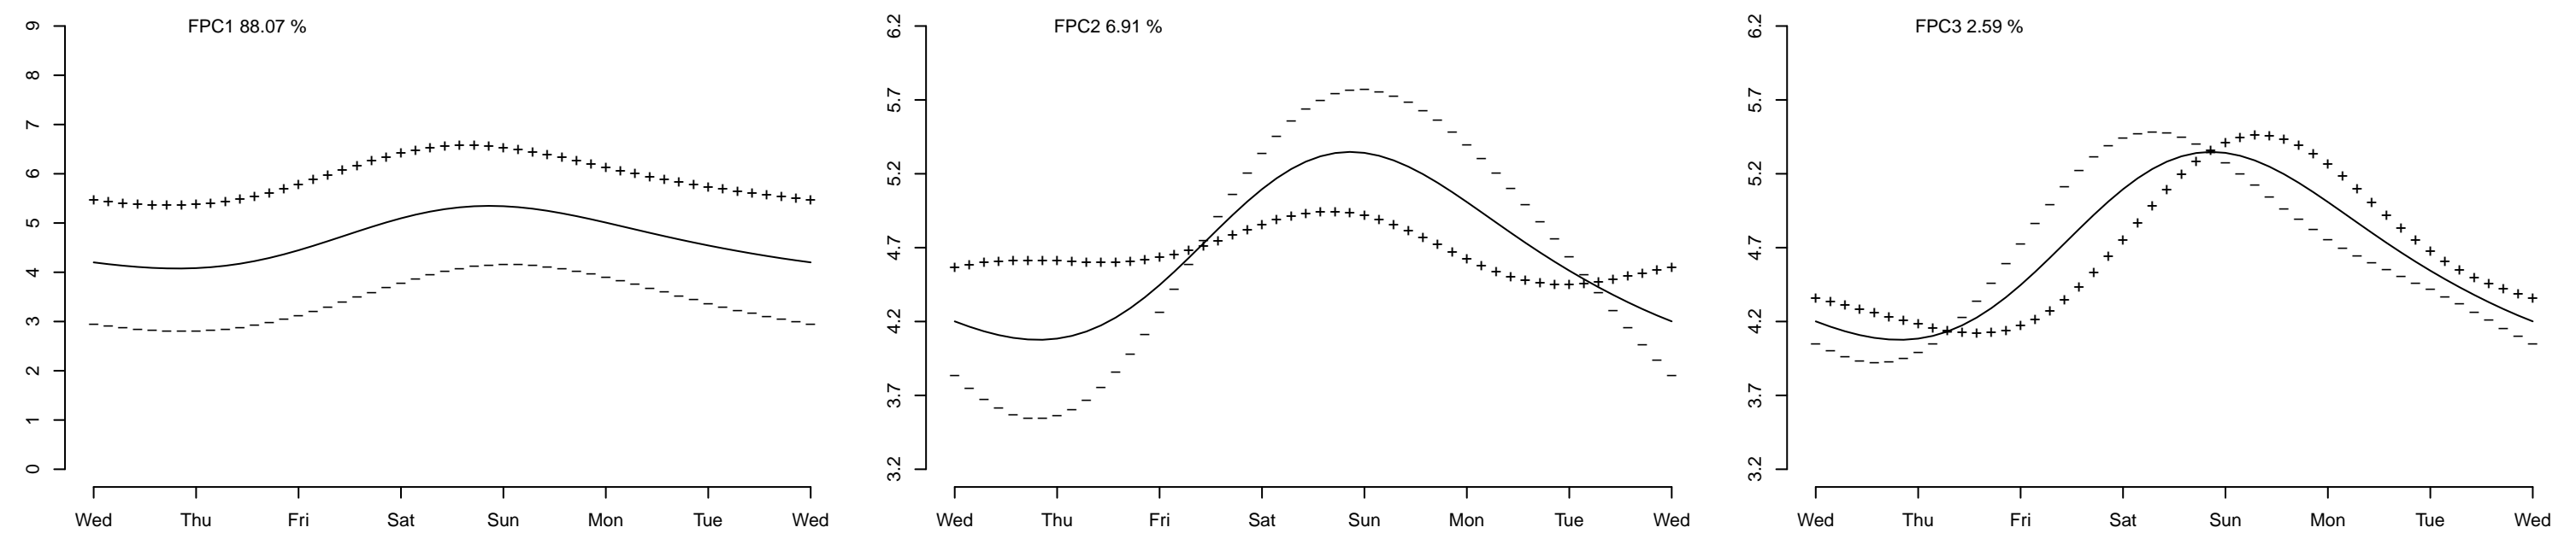**(B) Functional principal component analysis using Fourier basis functions with common-optimal smoothing**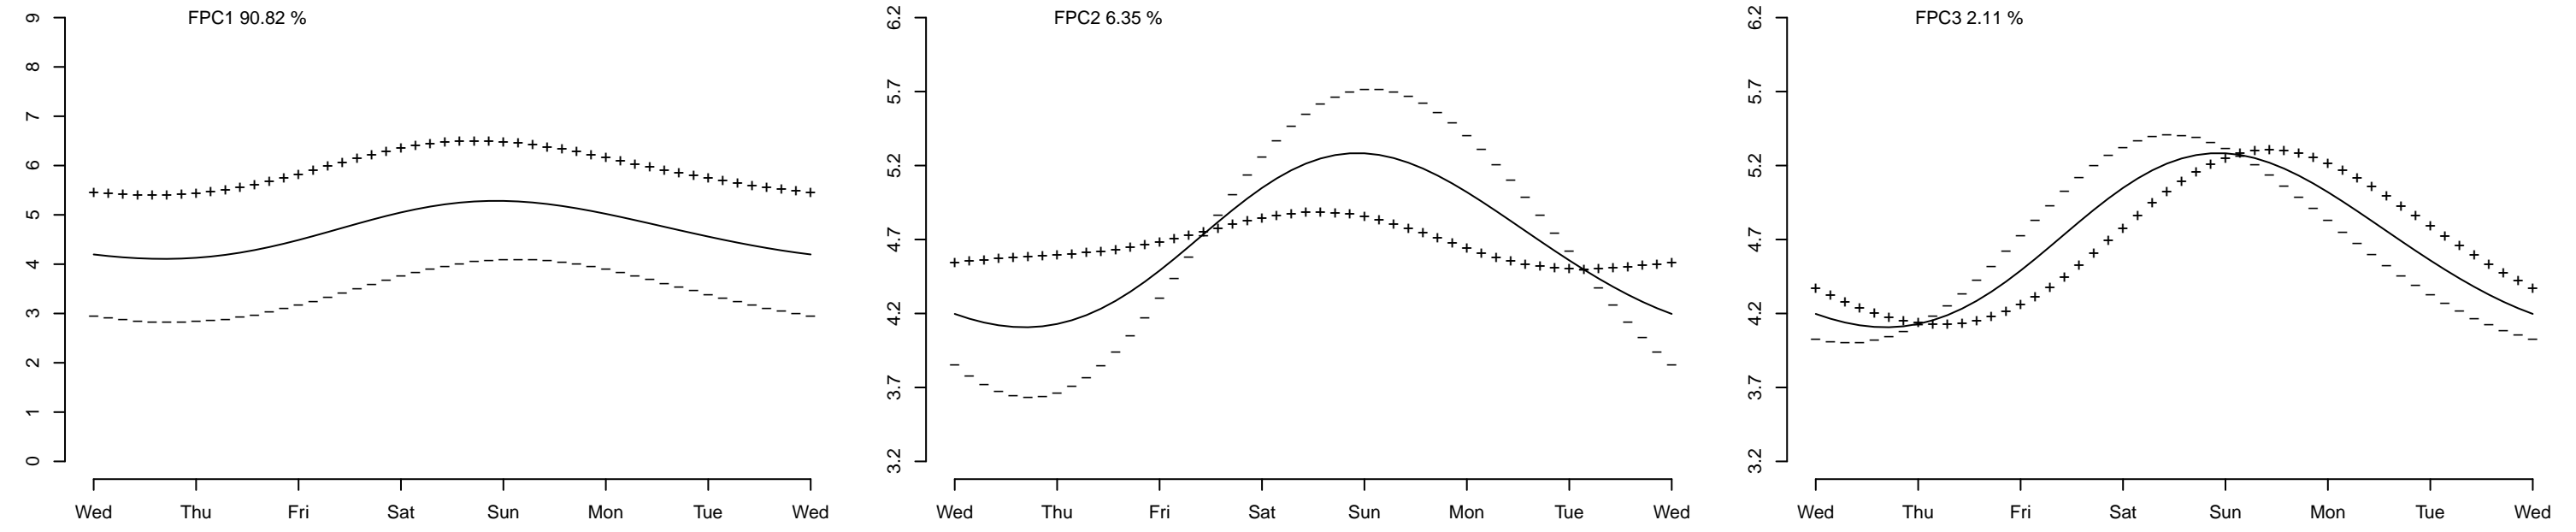**(C) Functional principal component analysis using Fourier basis functions with individual-optimal smoothing**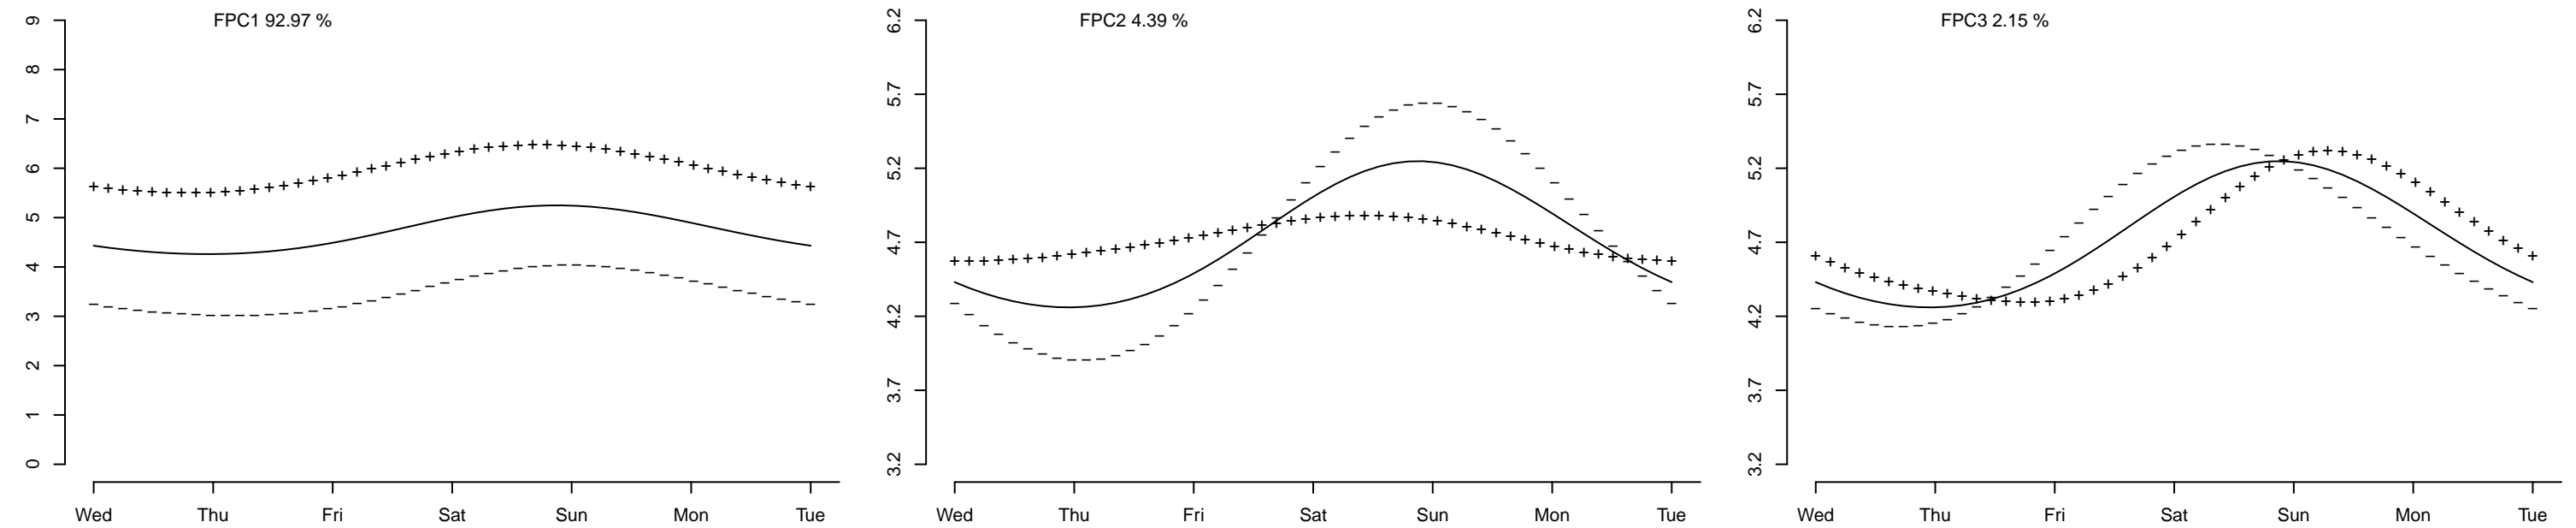**(D) Functional principal component analysis using B-spline basis functions with no smoothing**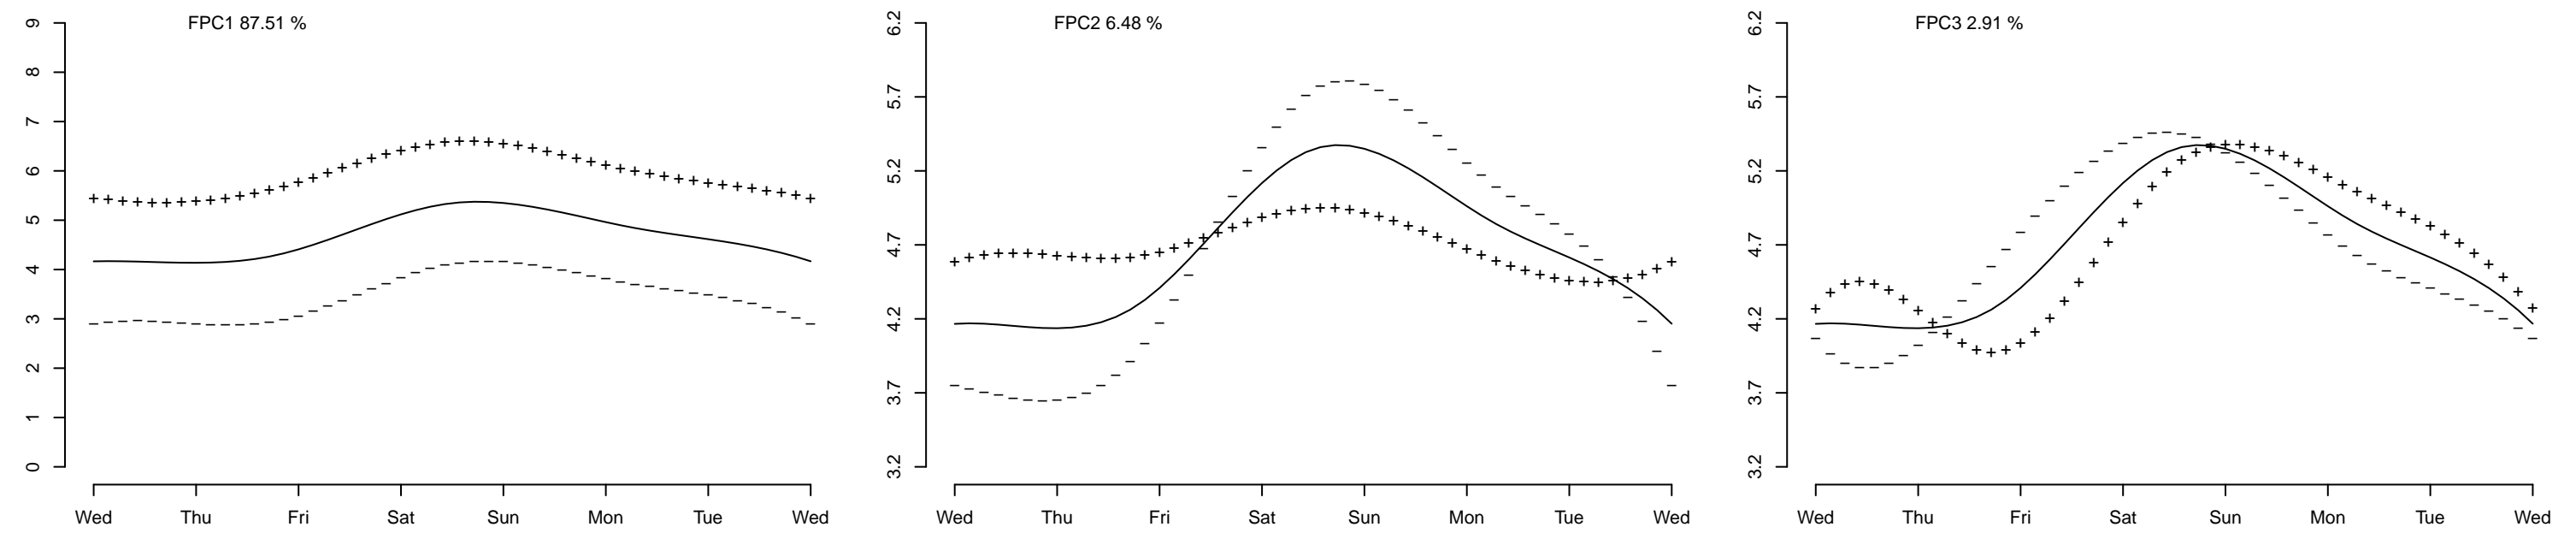**(E) Functional principal component analysis using B-spline basis functions with common-optimal smoothing**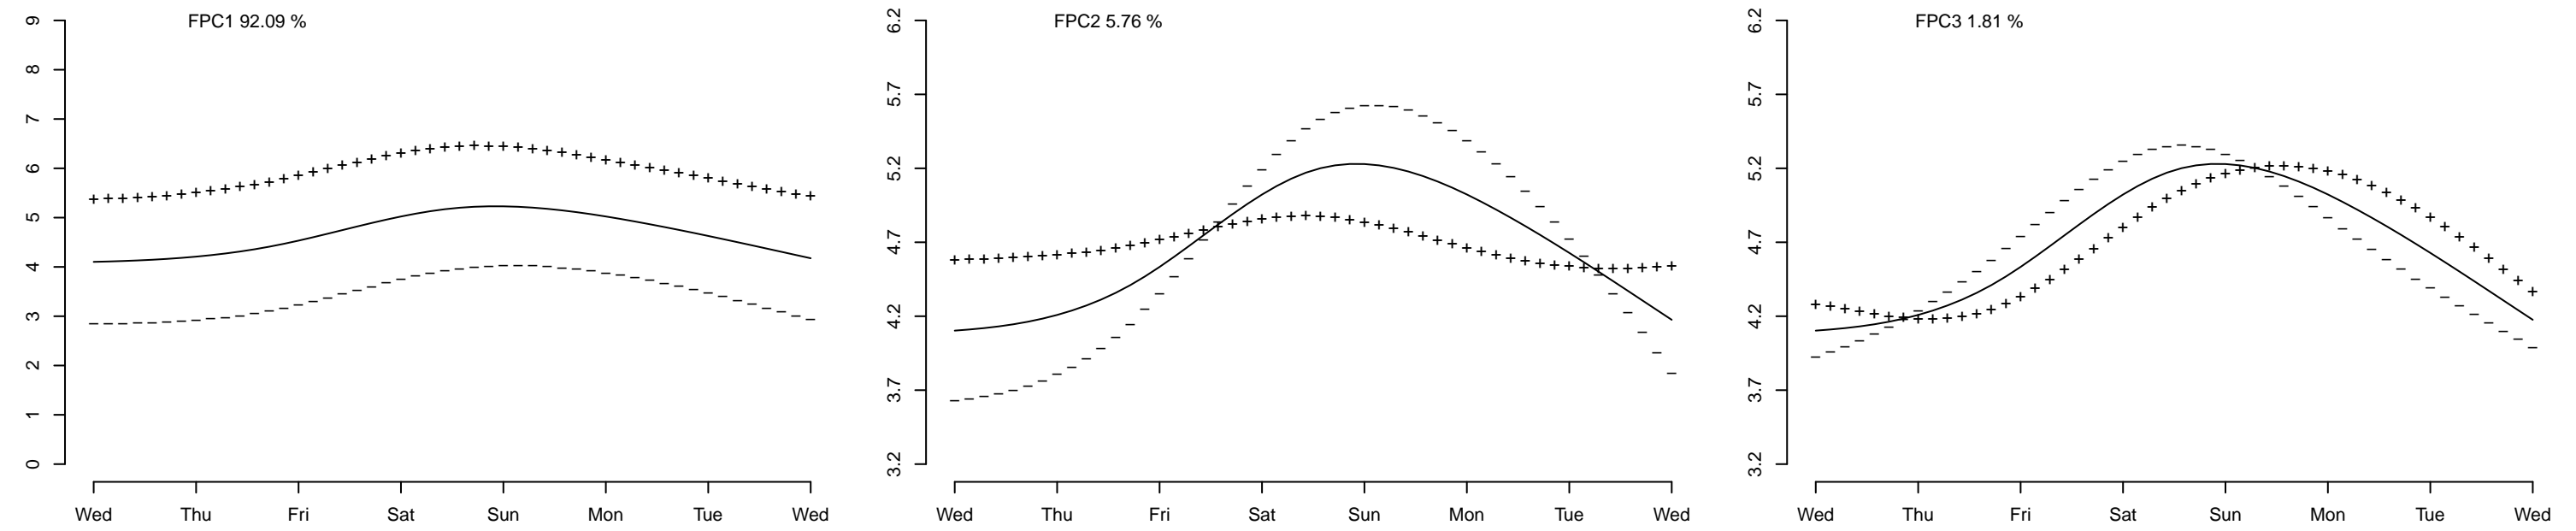**(F) Functional principal component analysis using B-spline basis functions with individual-optimal smoothing**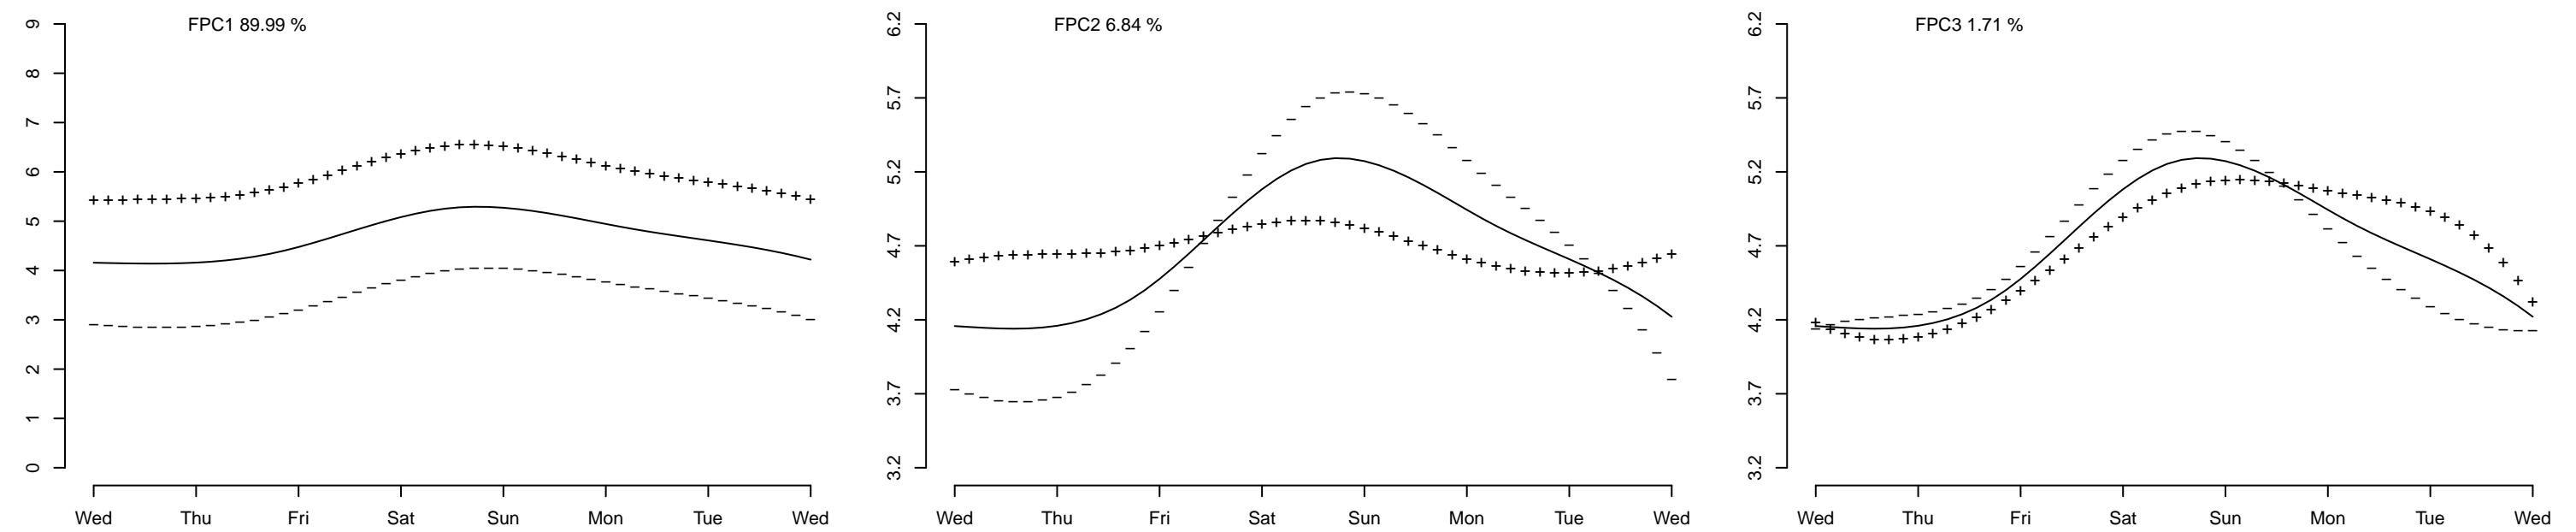

Supplement: MOESM1 [file 12089712]
